# Supplementary material
Source: PubMed Central journal article supplement (PMC3179827)
Supplement: NIHMS298943-supplement-supplement.pdf [file NIHMS298943-supplement-supplement.pdf]

Supplemental Figure 1

Supplemental Figure 1. Age distribution for mice analyzed for body weight shown in Figure 1A. No differences in mean age between the genotypes were detected for mice used to analyze body weight (manuscript Figure 1A). In addition, the distribution of ages for each genotype completely overlap so that the reduced body weight noted in Figure 1A for FST288-only mice was not due to age, but rather is a phenotype of FST288-only mice.
